# Supplementary material
Source: Research Square preprint supplement (doi:10.21203/rs.3.rs-9358637/v1)
Supplement: Supplementary file 1 [file 71e6177cce6175ca079818dc.docx]

**Extended data**

**Extended Data Fig.1 CALCRL distribution in the brain and its inhibition alleviates sAβ1-42-induced neuronal cell death *in vitro* and reduces paralysis in *Caenorhabditis elegans* CL2006.**

**a**, Characteristic information and the number of subjects in each group. **b**, UMAP of the associated cell type and clusters. **c-e**,UMAP visualization of cells expressing CALCRL in the reference (**c**), no dementia (**d**), and dementia (**e**) groups. **f**, CALCRL expression heatmap within each sample. **g**, Detailed characteristic information of subjects in each group. **h**, Western blot image and densitometry analysis of Calcrl proteins in mouse hippocampus. **i**, Chemical structure of Rim and its docking with the crystallized structure of CGRP receptor with PDB code 3N7R. **j**, Schematic representation of the experimental design and representative scanning electron microscopy images of sAβ1-42. Scale bars: 1 μm. **k**, Cell identification of primary cortical neurons. Scale bars: 100 μm (left) and 50 μm (right). **l**, The effect of different concentrations of Rim and *Calca*deficiency on primary cortical neuronal cell viability. **m**, Representative images of Hoechst 33342 and PI double staining and the quantification of PI-positive cells in primary neurons from WT and *Calca* KO mice treated with Veh, sAβ1-42 or Rim + sAβ1-42. Scale bars: 50 μm. **n**, Heatmap shows the expression of *Il-1β*, *NOS2*, *Il-6* and *Tnf-α* mRNA in primary mixglia stimulated by sAβ1-42. **o**, Schematic representation of the experimental design. **p**, Aβ-induced paralysis was delayed in AD transgenic nematode CL2006 treated with different concentrations of Rim. Error bars indicate mean ± s.e.m. n.s., non-significant. Exact *n* and *P* values are presented in Supplementary Table 1. Image in **j** created in BioRender.

**Extended Data Fig.2 Rim alleviates AD-related pathological features in AD mice.**

**a**, Representative Thioflavin-S staining hippocampal images. Scale bar: 100 μm. **b,c**, Quantitative measurements of Aβ plaque numbers (**b**) and area (**c**) in the hippocampus. **d-g**, ELISA quantification of soluble Aβ40 (**d**), soluble Aβ42 (**e**), insoluble Aβ40 (**f**), and insoluble Aβ42 (**g**) in the brains. Scale bar: 20 μm and 10 μm (ZOOM). **h**, Immunofluorescence staining of 6E10 (white), GFAP (red) and IBA1 (green) in the cortex. **i**, Quantification of total GFAP⁺ astrocytes and IBA1⁺ microglia, as well as Aβ-associated DAA (disease-associated astrocytes) and DAM (disease-associated microglia) in the cortex. **j-l**, Western blot image (**j**) densitometry analysis of APP, BACE1, GFAP and IBA1 proteins (**k**), and the ratio of phosphorylated tau to total tau (**l**) in the cortex. **m**, Immunofluorescence staining of IBA1 (green) and CD68 (red) in the cortex. Scale bar: 10 μm (ZOOM). **n**, Quantification of CD68⁺/IBA1⁺ area fractions. **o**, Immunofluorescence staining of GFAP (green) and C3 (red) in the cortex. Scale bar: 10 μm (ZOOM). **p**, Quantification of C3⁺/GFAP⁺ area fractions. **q-t**, Representative images of IBA1 immunostaining and the quantified IBA1+ cell body volume in the hippocampus (**q,r**) and cortex (**s,t**). Scale bar: 200 μm in (**q,s**). **u,v**, Quantitative PCR analysis in the hippocampus (**u**) and cortex (**v**). Error bars indicate mean ± s.e.m. n.s., non-significant. Exact *n* and *P* values are presented in Supplementary Table 1.

**Extended Data Fig.3 Functional enrichment analysis of differentially expressed genes and proteins.**

**a**, Schematic representation of the experimental design. **b**, Volcano plot of differentially expressed genes (DEGs) in 5×FAD+Veh(F) vs. WT+Veh(F) mice. **c**, Volcano plot of DEGs in 5×FAD+Veh(M) vs. WT+Veh(M) mice. **d**, Volcano plot of DEGs in 5×FAD+Rim(F) vs. WT+Veh(F) mice. **e**, Volcano plot of DEGs in 5×FAD+Rim(M) vs. WT+Veh(M) mice. **f**, Gene Ontology (GO) enrichment analysis of the DEGs in 5×FAD+Veh(F) vs. WT+Veh(F) mice. **g**, GO enrichment analysis of the DEGs in 5×FAD+Veh(M) vs. WT+Veh(M) mice. **h**, GO enrichment analysis of the DEGs in 5×FAD+Rim(F) vs. WT+Veh(F) mice. **i**, GO enrichment analysis of the DEGs in 5×FAD+Rim(M) vs. WT+Veh(M) mice. **j**, Gene set enrichment analysis (GSEA) of inflammatory pathways of DEGs in each group, vs. Corresponding WT+Veh group. **k**, Schematic representation of the experimental design. **l**, Multiple Volcano plots of differentially expressed proteins (DEPs) in each group, vs. Corresponding WT+Veh group. **m**, Kyoto encyclopedia of genes and genomes (KEGG) pathways enrichment analysis of DEPs in 5×FAD+Veh(F) vs. WT+Veh(F) and 5×FAD+Veh(M) vs. WT+Veh(M) mice. **n**, KEGG pathways enrichment analysis of DEPs in 5×FAD+Rim(F) vs. WT+Veh(F) and 5×FAD+Rim(M) vs. WT+Veh(M) mice. Image in **a,k** created in BioRender.

**Extended Data Fig.4 Weighted gene co-expression network analysis (WGCNA) and gene expression trend analysis.**

**a**, Sample dendrogram. **b**, Module gene clustering tree graph. **c**, Module gene correlation heat map.

**d**, Heatmap for the relationships of modules and trait. **e**,Soft clustering of the expression of genes using the Mfuzz algorithm. **f**, Soft clustering of the expression of proteins using the Mfuzz algorithm.

**Extended Data Fig.5 Ternary plot analysis of gene expression related to lipid and carbohydrate metabolism.**

**a,b**, Ternary plot analysis of gene expression related to lipid and carbohydrate metabolism in female (**a**) and male (**b**) 5×FAD mice.

**Extended Data Fig.6 HDAC11 distribution in the brain and its inhibition alleviates sAβ1-42-induced neuronal cell death *in vitro* and reduces paralysis in *Caenorhabditis elegans* CL2006**

**a**, UMAP of the associated cell type and clusters. **b,c**, UMAP visualization of cells expressing HDAC11 in the reference (**b**) and SEA-AD (**c**) groups. **d**, HDAC11 expression dot plot within each sample. **e**, Schematic representation of the experimental design. **f-h**, Western blot image (**f**) and densitometry analysis of HDAC11 in primary neuron (**g**) and mixglia (**h**). **i**, Schematic representation of the experimental design. **j**, The effect of different concentrations of Ele on primary cortical neuron cell viability treated with sAβ1-42 estimated by CCK-8 assay. k,l, Representative images of Hoechst 33342 and PI double fluorescent staining (**k**) and the quantification of PI-positive cells (**l**). Scale bars: 50 μm. **m**, Schematic representation of the experimental design. **n**, Aβ-induced paralysis was delayed in AD transgenic nematode CL2006 treated with different concentrations of Ele. Error bars indicate mean ± s.e.m. n.s., non-significant. Exact *n* and *P* values are presented in Supplementary Table 1.

**Extended Data Fig.7 Short-term inhibition of hippocampal HDAC11 function reduces astroglial activation in female 5×FAD mice.**

**a**, Schematic representation of the experimental design. **b**, Representative Thioflavin-S staining hippocampal images of 5×FAD mice after the administration of the vehicle or Ele. **c,d**, Quantitative measurements of Aβ plaque numbers (**c**) and area (**d**) in hippocampus. **e**, Immunofluorescence staining of GFAP (red) and IBA1 (green) in the hippocampus. **f,g**, Quantifications of GFAP+ astrocytes (**f**) and IBA1+ microglia (**g**) in hippocampus. h-j,Western blot image (**h**) and densitometry analysis of APP, phosphorylated tau, total tau, GFAP and IBA1 in the hippocampus (**i-j**). Scale bars: 100 μm in (**b,e**). Error bars indicate mean ± s.e.m. n.s., non-significant. Exact *n* and *P* values are presented in Supplementary Table 1. Image in **a** created in BioRender.

**Extended Data Fig.8 Neuron-specific knockdown of *Hdac11* promotes the reprogramming of lipid metabolism and inflammatory pathways.**

**a**, Schematic representation of the experimental design. **b**, UMAP of the associated cell clusters.

**c**, Gene expression dot plot showing the top-enriched genes for each cell cluster. **d**, Violin plots showing the expression of the top marker genes in different cell types. **e**, Percentage of each cell type and clusters identified in different groups. **f**, UMAP of the associated cell types. **g,h**, UMAP visualization of cells expressing Hdac11 in the female (**g**), and male (**h**) groups. **i,j**, Hdac11 expression dot plot within each cell type (**i**) and group (**j**). **k,l**, Cell-cell communication between neurons and other cells in the female (**k**), and male (**l**) groups. **m,n**, Cell-cell communication between microglia and other cells in the female (**m**), and male (**n**) groups. **o,p**, Volcano plots of DEGs across the indicated cell types in the female (**o**), and male (**p**) groups. **q,r**, GSEA of suppressed biological process of DEGs in female (**q**) and male mice (**r**). **s**, GSVA analysis of lipid metabolism and inflammatory pathways across different cell subsets. Image in **a** created in BioRender.

**Extended Data Fig.9 Inhibition of Calcrl/Hdac11 axis increases Abca1 expression and alleviates lipid accumulation in primary neurons treated with sAβ1-42 and 5xFAD mice.**

**a**, The top 10 confidence score and docking score. **b**, ELISA analysis of α-CGRP both in the cell lysates and the supernatants following sAβ1-42 treatment. **c**, Western blot image and densitometry analysis of Abca1, Hdac11 and α-CGRP in primary neurons. **d**, Immunofluorescence staining of NeuN (red) and Abca1 (green), and quantifications in primary neurons. Scale bars: 100. **e**, Immunofluorescence staining of NeuN (red) and BODIPY (green), and quantifications dots area in primary neurons. Scale bars: 10 μm. **f**, The effect of α-CGRP on primary cortical and hippocampal neuronal cell viability treated with sAβ1-42. **g**, Western blot image and densitometry analysis of Ab'ca1 an'd Hda'c11 in primary neurons. **h**, Immunofluorescence staining of MAP2 (red) and BODIPY (green), and quantifications dots area. Scale bars: 10 μm. **i**, Western blot and densitometric analysis of Abca1 and Hdac11. **j**, Immunofluorescence staining of IBA1 (red) and BODIPY (green), and quantifications dots area in sAβ1–42-treated primary neurons. Scale bars: 10 μm. **k**, Western blot image and densitometry analysis of Abca1 in the hippocampus of female and male mice of WT +veh, 5xFAD+veh, and 5xFAD+Rim groups. Error bars indicate mean ± s.e.m. n.s., non-significant. Exact *n* and *P* values are presented in Supplementary Table 1.

**Extended Data Fig.10 Inhibition of Calcrl/Hdac11 axis increases Abca1 expression and alleviates lipid accumulation and inflammation in microglia.**

**a**, Schematic representation of the experimental design. **b**, Western blot image and densitometry analysis of Abac1, Nlrp3, and Hdac11 in BV2 cells. **c**, Immunofluorescence staining of IBA1 (red) and BODIPY (green), and quantifications dots area in BV2 cells. Scale bars: 10 μm. **d**, Heatmap shows the expression of *NOS2*, *Tnf-α*, *Il-6* and *Il-1β* mRNA in BV2 cells. **e**, Western blot image and densitometry analysis of Abac1, Nlrp3, and Hdac11in BV2 cells. **f**, Immunofluorescence staining of IBA1 (red) and BODIPY (green), and quantifications dots area in BV2 cell. Scale bars: 10 μm. **g**, Heatmap shows the expression of *NOS2*, *Tnf-α*, *Il-6* and *Il-1β* mRNA in BV2 cells. **h**, Western blot and densitometric analysis of Abac1, Nlrp3, and Hdac11 in BV2 cells. **i**, Immunofluorescence staining of IBA1 (red) and BODIPY (green), and quantifications dots area in BV2 cells. Scale bars: 10 μm. **j**, Heatmap shows the expression of *NOS2*, *Tnf-α*, *Il-6* and *Il-1β* mRNA in BV2 cells. **k**, Schematic diagram of the mechanism of CGRP receptor inhibition in AD. Error bars indicate mean ± s.e.m. n.s., non-significant. Exact *n* and *P* values are presented in Supplementary Table 1. Image in **k** created in BioRender.
