# Supplementary material
Source: Research Square preprint supplement (doi:10.21203/rs.3.rs-9358637/v1)
Supplement: Supplementary file 1 [file 097432bacee8bc04704a37f3.xlsx]

## Sheet: Sheet1
Supplementary Table 1
Figure	Group	n	Sex	Comparison	p/q-value	Test
Fig.1e	No dementia	6	3F/3M
	Dementia	6	3F/3M	No dementia vs. Dementia	0.0087	two-tailed Student’s t-tests
Fig.1f	No dementia	6	3F/3M
	Dementia	6	3F/3M	No dementia vs. Dementia	0.0326	two-tailed Student’s t-tests
Fig.1k	5XFAD	10	F
	5XFAD;Calca-/-	8	F	5XFAD vs. 5XFAD;Calca-/-	0.6275	two-tailed Student’s t-tests
	5XFAD	10	M
	5XFAD;Calca-/-	9	M	5XFAD vs. 5XFAD;Calca-/-	0.5619	two-tailed Student’s t-tests
Fig.1L	5XFAD	10	F
	5XFAD;Calca-/-	8	F	5XFAD vs. 5XFAD;Calca-/-	0.006	two-tailed Student’s t-tests
	5XFAD	10	M
	5XFAD;Calca-/-	9	M	5XFAD vs. 5XFAD;Calca-/-	0.323	two-tailed Student’s t-tests
Fig.1n	5XFAD	10	F
	5XFAD;Calca-/-	8	F	5XFAD vs. 5XFAD;Calca-/-	0.0176	two-tailed Student’s t-tests
	5XFAD	10	M
	5XFAD;Calca-/-	9	M	5XFAD vs. 5XFAD;Calca-/-	0.0467	two-tailed Student’s t-tests
Fig.1o	5XFAD	10	F
	5XFAD;Calca-/-	8	F	5XFAD vs. 5XFAD;Calca-/-	0.152	two-tailed Student’s t-tests
	5XFAD	10	M
	5XFAD;Calca-/-	9	M	5XFAD vs. 5XFAD;Calca-/-	0.1048	two-tailed Student’s t-tests
Fig.1p	5XFAD	10	F
	5XFAD;Calca-/-	8	F	5XFAD vs. 5XFAD;Calca-/-	0.3503	two-tailed Student’s t-tests
	5XFAD	10	M
	5XFAD;Calca-/-	9	M	5XFAD vs. 5XFAD;Calca-/-	0.8195	two-tailed Student’s t-tests
Fig.1q	5XFAD	10	F
	5XFAD;Calca-/-	8	F	5XFAD vs. 5XFAD;Calca-/-	0.008	two-tailed Student’s t-tests
	5XFAD	10	M
	5XFAD;Calca-/-	9	M	5XFAD vs. 5XFAD;Calca-/-	0.8507	two-tailed Student’s t-tests
Fig.1s	5XFAD	10	F
	5XFAD;Calca-/-	8	F	5XFAD vs. 5XFAD;Calca-/-	0.2334	two-tailed Student’s t-tests
	5XFAD	10	M
	5XFAD;Calca-/-	9	M	5XFAD vs. 5XFAD;Calca-/-	0.9925	two-tailed Student’s t-tests
Fig.1t	5XFAD	10	F
	5XFAD;Calca-/-	8	F	5XFAD vs. 5XFAD;Calca-/-	0.0072	two-tailed Student’s t-tests
	5XFAD	10	M
	5XFAD;Calca-/-	9	M	5XFAD vs. 5XFAD;Calca-/-	0.027	two-tailed Student’s t-tests
Fig.1u	5XFAD	10	F
	5XFAD;Calca-/-	8	F	5XFAD vs. 5XFAD;Calca-/-	5d 0.0009/6d 0.0013	two-tailed Student’s t-tests
Fig.1v	5XFAD	10	M
	5XFAD;Calca-/-	9	M	5XFAD vs. 5XFAD;Calca-/-	5d 0.1203/6d 0.0191	two-tailed Student’s t-tests
Fig.1x	5XFAD	10	F
	5XFAD;Calca-/-	8	F	5XFAD vs. 5XFAD;Calca-/-	0.0386	two-tailed Student’s t-tests
	5XFAD	10	M
	5XFAD;Calca-/-	9	M	5XFAD vs. 5XFAD;Calca-/-	0.0573	two-tailed Student’s t-tests
Fig.1y	5XFAD	10	F
	5XFAD;Calca-/-	8	F	5XFAD vs. 5XFAD;Calca-/-	0.0326	two-tailed Student’s t-tests
	5XFAD	10	M
	5XFAD;Calca-/-	9	M	5XFAD vs. 5XFAD;Calca-/-	0.0013	two-tailed Student’s t-tests
Fig.2b	5XFAD	6	F
	5XFAD;Calca-/-	6	F	5XFAD vs. 5XFAD;Calca-/-	0.0003	two-tailed Student’s t-tests
	5XFAD	6	M
	5XFAD;Calca-/-	6	M	5XFAD vs. 5XFAD;Calca-/-	0.0106	two-tailed Student’s t-tests
Fig.2c	5XFAD	6	F
	5XFAD;Calca-/-	6	F	5XFAD vs. 5XFAD;Calca-/-	0.0037	two-tailed Student’s t-tests
	5XFAD	6	M
	5XFAD;Calca-/-	6	M	5XFAD vs. 5XFAD;Calca-/-	0.0007	two-tailed Student’s t-tests
Fig.2d	5XFAD	6	F
	5XFAD;Calca-/-	6	F	5XFAD vs. 5XFAD;Calca-/-	0.0094	two-tailed Student’s t-tests
	5XFAD	6	M
	5XFAD;Calca-/-	6	M	5XFAD vs. 5XFAD;Calca-/-	0.1888	two-tailed Student’s t-tests
Fig.2e	5XFAD	6	F
	5XFAD;Calca-/-	6	F	5XFAD vs. 5XFAD;Calca-/-	0.001	two-tailed Student’s t-tests
	5XFAD	6	M
	5XFAD;Calca-/-	6	M	5XFAD vs. 5XFAD;Calca-/-	0.0298	two-tailed Student’s t-tests
	5XFAD	5	F
Fig.2f	5XFAD;Calca-/-	6	F	5XFAD vs. 5XFAD;Calca-/-	0.2715	two-tailed Student’s t-tests
	5XFAD	5	M
	5XFAD;Calca-/-	6	M	5XFAD vs. 5XFAD;Calca-/-	0.6695	two-tailed Student’s t-tests
Fig.2g	5XFAD	5	F
	5XFAD;Calca-/-	6	F	5XFAD vs. 5XFAD;Calca-/-	0.046	two-tailed Student’s t-tests
	5XFAD	5	M
	5XFAD;Calca-/-	6	M	5XFAD vs. 5XFAD;Calca-/-	0.0443	two-tailed Student’s t-tests
Fig.2h	5XFAD	5	F
	5XFAD;Calca-/-	6	F	5XFAD vs. 5XFAD;Calca-/-	0.1637	two-tailed Student’s t-tests
	5XFAD	5	M
	5XFAD;Calca-/-	6	M	5XFAD vs. 5XFAD;Calca-/-	0.1142	two-tailed Student’s t-tests
Fig.2i	5XFAD	5	F
	5XFAD;Calca-/-	6	F	5XFAD vs. 5XFAD;Calca-/-	0.002	two-tailed Student’s t-tests
	5XFAD	5	M
	5XFAD;Calca-/-	6	M	5XFAD vs. 5XFAD;Calca-/-	0.0347	two-tailed Student’s t-tests
Fig.2k	5XFAD	6	F	App
	5XFAD;Calca-/-	6	F	F: 5XFAD vs. 5XFAD;Calca-/-	0.0017	two-tailed Student’s t-tests
	5XFAD	6	M	M: 5XFAD vs. 5XFAD;Calca-/-	0.034
	5XFAD;Calca-/-	6	M	Gfap
				F: 5XFAD vs. 5XFAD;Calca-/-	0.0284	two-tailed Student’s t-tests
				M: 5XFAD vs. 5XFAD;Calca-/-	0.0367
				Iba1
				F: 5XFAD vs. 5XFAD;Calca-/-	0.0006	two-tailed Student’s t-tests
				M: 5XFAD vs. 5XFAD;Calca-/-	0.1448
Fig.2l	5XFAD	6	F
	5XFAD;Calca-/-	6	F	5XFAD vs. 5XFAD;Calca-/-	0.0212	two-tailed Student’s t-tests
	5XFAD	6	M
	5XFAD;Calca-/-	6	M	5XFAD vs. 5XFAD;Calca-/-	0.3306	two-tailed Student’s t-tests
Fig.2n	5XFAD	6	F	App
	5XFAD;Calca-/-	6	F	F: 5XFAD vs. 5XFAD;Calca-/-	0.0029	two-tailed Student’s t-tests
	5XFAD	6	M	M: 5XFAD vs. 5XFAD;Calca-/-	0.888
	5XFAD;Calca-/-	6	M	Gfap
				F: 5XFAD vs. 5XFAD;Calca-/-	0.0164	two-tailed Student’s t-tests
				M: 5XFAD vs. 5XFAD;Calca-/-	0.9883
				Iba1
				F: 5XFAD vs. 5XFAD;Calca-/-	0.9886	two-tailed Student’s t-tests
				M: 5XFAD vs. 5XFAD;Calca-/-	0.1994
Fig.2o	5XFAD	6	F
	5XFAD;Calca-/-	6	F	5XFAD vs. 5XFAD;Calca-/-	0.0378	two-tailed Student’s t-tests
	5XFAD	6	M
	5XFAD;Calca-/-	6	M	5XFAD vs. 5XFAD;Calca-/-	0.6124	two-tailed Student’s t-tests
Fig.2q	5XFAD	6	F	Microglia
	5XFAD;Calca-/-	6	F	F: 5XFAD vs. 5XFAD;Calca-/-	0.0395	two-tailed Student’s t-tests
	5XFAD	6	M	M: 5XFAD vs. 5XFAD;Calca-/-	0.1316
	5XFAD;Calca-/-	6	M	DAM
				F: 5XFAD vs. 5XFAD;Calca-/-	0.0066	two-tailed Student’s t-tests
				M: 5XFAD vs. 5XFAD;Calca-/-	0.011
				Astrocytes
				F: 5XFAD vs. 5XFAD;Calca-/-	0.0124	two-tailed Student’s t-tests
				M: 5XFAD vs. 5XFAD;Calca-/-	0.0027
				DAA
				F: 5XFAD vs. 5XFAD;Calca-/-	0.0191	two-tailed Student’s t-tests
				M: 5XFAD vs. 5XFAD;Calca-/-	0.0137
Fig.2r	5XFAD	6	F	Microglia
	5XFAD;Calca-/-	6	F	F: 5XFAD vs. 5XFAD;Calca-/-	0.2698	two-tailed Student’s t-tests
	5XFAD	6	M	M: 5XFAD vs. 5XFAD;Calca-/-	0.0545
	5XFAD;Calca-/-	6	M	DAM
				F: 5XFAD vs. 5XFAD;Calca-/-	0.0039	two-tailed Student’s t-tests
				M: 5XFAD vs. 5XFAD;Calca-/-	0.003
				Astrocytes
				F: 5XFAD vs. 5XFAD;Calca-/-	0.8486	two-tailed Student’s t-tests
				M: 5XFAD vs. 5XFAD;Calca-/-	0.0216
				DAA
				F: 5XFAD vs. 5XFAD;Calca-/-	0.0196	two-tailed Student’s t-tests
				M: 5XFAD vs. 5XFAD;Calca-/-	0.0225
Fig.2t	5XFAD	6	F
	5XFAD;Calca-/-	6	F	5XFAD vs. 5XFAD;Calca-/-	0.003	two-tailed Student’s t-tests
	5XFAD	6	M
	5XFAD;Calca-/-	6	M	5XFAD vs. 5XFAD;Calca-/-	0.0055	two-tailed Student’s t-tests
Fig.2u	5XFAD	6	F
	5XFAD;Calca-/-	6	F	5XFAD vs. 5XFAD;Calca-/-	0.0112	two-tailed Student’s t-tests
	5XFAD	6	M
	5XFAD;Calca-/-	6	M	5XFAD vs. 5XFAD;Calca-/-	0.0029	two-tailed Student’s t-tests
Fig.2w	5XFAD	6	F
	5XFAD;Calca-/-	6	F	5XFAD vs. 5XFAD;Calca-/-	0.0379	two-tailed Student’s t-tests
	5XFAD	6	M
	5XFAD;Calca-/-	6	M	5XFAD vs. 5XFAD;Calca-/-	0.108	two-tailed Student’s t-tests
Fig.2x	5XFAD	6	F
	5XFAD;Calca-/-	6	F	5XFAD vs. 5XFAD;Calca-/-	0.0082	two-tailed Student’s t-tests
	5XFAD	6	M
	5XFAD;Calca-/-	6	M	5XFAD vs. 5XFAD;Calca-/-	0.3985	two-tailed Student’s t-tests
Fig.3c	WT+Veh	10	F
	5XFAD+Veh	10	F	5XFAD+Veh vs. WT+Veh	0.0722	One-way ANOVA with post hoc Dunnett’s test
	5XFAD+Rim	10	F	5XFAD+Veh vs. 5XFAD+Rim	0.0028	One-way ANOVA with post hoc Dunnett’s test
	WT+Veh	9	M
	5XFAD+Veh	10	M	5XFAD+Veh vs. WT+Veh	0.4109	One-way ANOVA with post hoc Dunnett’s test
	5XFAD+Rim	10	M	5XFAD+Veh vs. 5XFAD+Rim	0.4176	One-way ANOVA with post hoc Dunnett’s test
Fig.3d	WT+Veh	10	F
	5XFAD+Veh	10	F	5XFAD+Veh vs. WT+Veh	0.0219	One-way ANOVA with post hoc Dunnett’s test
	5XFAD+Rim	10	F	5XFAD+Veh vs. 5XFAD+Rim	0.0001	One-way ANOVA with post hoc Dunnett’s test
	WT+Veh	9	M
	5XFAD+Veh	10	M	5XFAD+Veh vs. WT+Veh	0.9917	One-way ANOVA with post hoc Dunnett’s test
	5XFAD+Rim	10	M	5XFAD+Veh vs. 5XFAD+Rim	0.9922	One-way ANOVA with post hoc Dunnett’s test
Fig.3e	WT+Veh	10	F
	5XFAD+Veh	9	F	5XFAD+Veh vs. WT+Veh	0.004	One-way ANOVA with post hoc Dunnett’s test
	5XFAD+Rim	10	F	5XFAD+Veh vs. 5XFAD+Rim	0.0167	One-way ANOVA with post hoc Dunnett’s test
	WT+Veh	9	M
	5XFAD+Veh	10	M	5XFAD+Veh vs. WT+Veh	0.3051	One-way ANOVA with post hoc Dunnett’s test
	5XFAD+Rim	10	M	5XFAD+Veh vs. 5XFAD+Rim	0.9422	One-way ANOVA with post hoc Dunnett’s test
Fig.3f	WT+Veh	10	F
	5XFAD+Veh	10	F	5XFAD+Veh vs. WT+Veh	0.8415	One-way ANOVA with post hoc Dunnett’s test
	5XFAD+Rim	10	F	5XFAD+Veh vs. 5XFAD+Rim	0.8458	One-way ANOVA with post hoc Dunnett’s test
	WT+Veh	9	M
	5XFAD+Veh	10	M	5XFAD+Veh vs. WT+Veh	0.0002	One-way ANOVA with post hoc Dunnett’s test
	5XFAD+Rim	10	M	5XFAD+Veh vs. 5XFAD+Rim	0.0354	One-way ANOVA with post hoc Dunnett’s test
Fig.3g	WT+Veh	10	F
	5XFAD+Veh	9	F	5XFAD+Veh vs. WT+Veh	0.5542	One-way ANOVA with post hoc Dunnett’s test
	5XFAD+Rim	10	F	5XFAD+Veh vs. 5XFAD+Rim	0.6632	One-way ANOVA with post hoc Dunnett’s test
	WT+Veh	9	M
	5XFAD+Veh	10	M	5XFAD+Veh vs. WT+Veh	0.7426	One-way ANOVA with post hoc Dunnett’s test
	5XFAD+Rim	10	M	5XFAD+Veh vs. 5XFAD+Rim	0.9961	One-way ANOVA with post hoc Dunnett’s test
Fig.3h	WT+Veh	10	F
	5XFAD+Veh	9	F	5XFAD+Veh vs. WT+Veh	0.0083	One-way ANOVA with post hoc Dunnett’s test
	5XFAD+Rim	10	F	5XFAD+Veh vs. 5XFAD+Rim	0.0017	One-way ANOVA with post hoc Dunnett’s test
	WT+Veh	9	M
	5XFAD+Veh	10	M	5XFAD+Veh vs. WT+Veh	0.9258	One-way ANOVA with post hoc Dunnett’s test
	5XFAD+Rim	10	M	5XFAD+Veh vs. 5XFAD+Rim	0.354	One-way ANOVA with post hoc Dunnett’s test
Fig.3i	WT+Veh	10	F
	5XFAD+Veh	10	F	5XFAD+Veh vs. WT+Veh	0.0631	One-way ANOVA with post hoc Dunnett’s test
	5XFAD+Rim	10	F	5XFAD+Veh vs. 5XFAD+Rim	0.9988	One-way ANOVA with post hoc Dunnett’s test
	WT+Veh	9	M
	5XFAD+Veh	10	M	5XFAD+Veh vs. WT+Veh	0.0172	One-way ANOVA with post hoc Dunnett’s test
	5XFAD+Rim	10	M	5XFAD+Veh vs. 5XFAD+Rim	0.0028	One-way ANOVA with post hoc Dunnett’s test
Fig.3j	WT+Veh	10	F
	5XFAD+Veh	9	F	5XFAD+Veh vs. WT+Veh	0.0114	One-way ANOVA with post hoc Dunnett’s test
	5XFAD+Rim	10	F	5XFAD+Veh vs. 5XFAD+Rim	0.0032	One-way ANOVA with post hoc Dunnett’s test
	WT+Veh	9	M
	5XFAD+Veh	10	M	5XFAD+Veh vs. WT+Veh	0.3637	One-way ANOVA with post hoc Dunnett’s test
	5XFAD+Rim	10	M	5XFAD+Veh vs. 5XFAD+Rim	0.1603	One-way ANOVA with post hoc Dunnett’s test
Fig.3k	WT+Veh	10	F
	5XFAD+Veh	10	F	5XFAD+Veh vs. WT+Veh	5d: 0.5775	One-way ANOVA with post hoc Dunnett’s test
	5XFAD+Rim	10	F	5XFAD+Veh vs. 5XFAD+Rim	5d: 0.9295	One-way ANOVA with post hoc Dunnett’s test
Fig.3l	WT+Veh	9	M
	5XFAD+Veh	10	M	5XFAD+Veh vs. WT+Veh	0.0068	One-way ANOVA with post hoc Dunnett’s test
	5XFAD+Rim	10	M	5XFAD+Veh vs. 5XFAD+Rim	0.0102	One-way ANOVA with post hoc Dunnett’s test
Fig.3m	WT+Veh	10	F
	5XFAD+Veh	10	F	5XFAD+Veh vs. WT+Veh	0.423	One-way ANOVA with post hoc Dunnett’s test
	5XFAD+Rim	10	F	5XFAD+Veh vs. 5XFAD+Rim	0.9421	One-way ANOVA with post hoc Dunnett’s test
	WT+Veh	9	M
	5XFAD+Veh	10	M	5XFAD+Veh vs. WT+Veh	0.0296	One-way ANOVA with post hoc Dunnett’s test
	5XFAD+Rim	10	M	5XFAD+Veh vs. 5XFAD+Rim	0.0303	One-way ANOVA with post hoc Dunnett’s test
Fig.3n	WT+Veh	10	F
	5XFAD+Veh	10	F	5XFAD+Veh vs. WT+Veh	0.0281	One-way ANOVA with post hoc Dunnett’s test
	5XFAD+Rim	10	F	5XFAD+Veh vs. 5XFAD+Rim	0.0237	One-way ANOVA with post hoc Dunnett’s test
	WT+Veh	9	M
	5XFAD+Veh	10	M	5XFAD+Veh vs. WT+Veh	0.0108	One-way ANOVA with post hoc Dunnett’s test
	5XFAD+Rim	10	M	5XFAD+Veh vs. 5XFAD+Rim	0.0283	One-way ANOVA with post hoc Dunnett’s test
Fig.3p	WT+Veh	6	F
	5XFAD+Veh	6	F	5XFAD+Veh vs. WT+Veh	<0.0001	One-way ANOVA with post hoc Dunnett’s test
	5XFAD+Rim	6	F	5XFAD+Veh vs. 5XFAD+Rim	0.0009	One-way ANOVA with post hoc Dunnett’s test
	WT+Veh	6	M
	5XFAD+Veh	6	M	5XFAD+Veh vs. WT+Veh	0.0001	One-way ANOVA with post hoc Dunnett’s test
	5XFAD+Rim	6	M	5XFAD+Veh vs. 5XFAD+Rim	0.5886	One-way ANOVA with post hoc Dunnett’s test
Fig.3q	WT+Veh	6	F
	5XFAD+Veh	6	F	5XFAD+Veh vs. WT+Veh	<0.0001	One-way ANOVA with post hoc Dunnett’s test
	5XFAD+Rim	6	F	5XFAD+Veh vs. 5XFAD+Rim	0.0083	One-way ANOVA with post hoc Dunnett’s test
	WT+Veh	6	M
	5XFAD+Veh	6	M	5XFAD+Veh vs. WT+Veh	0.0003	One-way ANOVA with post hoc Dunnett’s test
	5XFAD+Rim	6	M	5XFAD+Veh vs. 5XFAD+Rim	0.0194	One-way ANOVA with post hoc Dunnett’s test
Fig.3s	WT+Veh	6	F	Microglia
	5XFAD+Veh	6	F	F: 5XFAD+Veh vs. WT+Veh	0.993	One-way ANOVA with post hoc Dunnett’s test
	5XFAD+Rim	6	F	F: 5XFAD+Veh vs. 5XFAD+Rim	0.3621
	WT+Veh	6	M	M: 5XFAD+Veh vs. WT+Veh	0.1062
	5XFAD+Veh	6	M	M: 5XFAD+Veh vs. 5XFAD+Rim	0.1313
	5XFAD+Rim	6	M
				DAM
				F: 5XFAD+Veh vs. 5XFAD+Rim	<0.0001	One-way ANOVA with post hoc Dunnett’s test
				M: 5XFAD+Veh vs. 5XFAD+Rim	0.0188
				Astrocytes
				F: 5XFAD+Veh vs. WT+Veh	0.0156	One-way ANOVA with post hoc Dunnett’s test
				F: 5XFAD+Veh vs. 5XFAD+Rim	0.0118
				M: 5XFAD+Veh vs. WT+Veh	<0.0001
				M: 5XFAD+Veh vs. 5XFAD+Rim	0.0134
				DAA
				F: 5XFAD+Veh vs. 5XFAD+Rim	0.0036	One-way ANOVA with post hoc Dunnett’s test
				M: 5XFAD+Veh vs. 5XFAD+Rim	0.0024
Fig.3u	WT+Veh	6	F	App
	5XFAD+Veh	6	F	F: 5XFAD+Veh vs. WT+Veh	0.0001	One-way ANOVA with post hoc Dunnett’s test
	5XFAD+Rim	6	F	F: 5XFAD+Veh vs. 5XFAD+Rim	0.0056
	WT+Veh	6	M	M: 5XFAD+Veh vs. WT+Veh	0.0002
	5XFAD+Veh	6	M	M: 5XFAD+Veh vs. 5XFAD+Rim	0.0142
	5XFAD+Rim	6	M	Gfap
				F: 5XFAD+Veh vs. WT+Veh	<0.0001	One-way ANOVA with post hoc Dunnett’s test
				F: 5XFAD+Veh vs. 5XFAD+Rim	0.0481
				M: 5XFAD+Veh vs. WT+Veh	0.0031
				M: 5XFAD+Veh vs. 5XFAD+Rim	0.0268
				Iba1
				F: 5XFAD+Veh vs. WT+Veh	0.0003	One-way ANOVA with post hoc Dunnett’s test
				F: 5XFAD+Veh vs. 5XFAD+Rim	0.0017
				M: 5XFAD+Veh vs. WT+Veh	0.0253
				M: 5XFAD+Veh vs. 5XFAD+Rim	0.4438
Fig.3v	WT+Veh	6	F
	5XFAD+Veh	6	F	5XFAD+Veh vs. WT+Veh	0.0024	One-way ANOVA with post hoc Dunnett’s test
	5XFAD+Rim	6	F	5XFAD+Veh vs. 5XFAD+Rim	0.0188	One-way ANOVA with post hoc Dunnett’s test
	WT+Veh	6	M
	5XFAD+Veh	6	M	5XFAD+Veh vs. WT+Veh	0.0262	One-way ANOVA with post hoc Dunnett’s test
	5XFAD+Rim	6	M	5XFAD+Veh vs. 5XFAD+Rim	0.018	One-way ANOVA with post hoc Dunnett’s test
Fig.3x	WT+Veh	6	F
	5XFAD+Veh	6	F	5XFAD+Veh vs. WT+Veh	<0.0001	One-way ANOVA with post hoc Dunnett’s test
	5XFAD+Rim	6	F	5XFAD+Veh vs. 5XFAD+Rim	0.0093	One-way ANOVA with post hoc Dunnett’s test
	WT+Veh	6	M
	5XFAD+Veh	6	M	5XFAD+Veh vs. WT+Veh	<0.0001	One-way ANOVA with post hoc Dunnett’s test
	5XFAD+Rim	6	M	5XFAD+Veh vs. 5XFAD+Rim	0.0069	One-way ANOVA with post hoc Dunnett’s test
Fig.3z	WT+Veh	6	F
	5XFAD+Veh	6	F	5XFAD+Veh vs. WT+Veh	<0.0001	One-way ANOVA with post hoc Dunnett’s test
	5XFAD+Rim	6	F	5XFAD+Veh vs. 5XFAD+Rim	0.0494	One-way ANOVA with post hoc Dunnett’s test
	WT+Veh	6	M
	5XFAD+Veh	6	M	5XFAD+Veh vs. WT+Veh	<0.0001	One-way ANOVA with post hoc Dunnett’s test
	5XFAD+Rim	6	M	5XFAD+Veh vs. 5XFAD+Rim	0.0087	One-way ANOVA with post hoc Dunnett’s test
Fig.4m	WT+Veh	6(60 microglia)	F
	5XFAD+Veh	6(60 microglia)	F	5XFAD+Veh vs. WT+Veh	<0.0001	two-tailed Student’s t-tests
	5XFAD+Rim	6(60 microglia)	F	5XFAD+Veh vs. 5XFAD+Rim	0.0137	two-tailed Student’s t-tests
	WT+Veh	6(60 microglia)	M
	5XFAD+Veh	6(60 microglia)	M	5XFAD+Veh vs. WT+Veh	<0.0001	two-tailed Student’s t-tests
	5XFAD+Rim	6(60 microglia)	M	5XFAD+Veh vs. 5XFAD+Rim	0.0031	two-tailed Student’s t-tests
Fig.4r	WT+Veh	6	F
	5XFAD+Veh	6	F	5XFAD+Veh vs. WT+Veh	0.0002	One-way ANOVA with post hoc Dunnett’s test
	5XFAD+Rim	6	F	5XFAD+Veh vs. 5XFAD+Rim	0.017	One-way ANOVA with post hoc Dunnett’s test
	WT+Veh	6	M
	5XFAD+Veh	6	M	5XFAD+Veh vs. WT+Veh	0.0026	One-way ANOVA with post hoc Dunnett’s test
	5XFAD+Rim	6	M	5XFAD+Veh vs. 5XFAD+Rim	0.0272	One-way ANOVA with post hoc Dunnett’s test
Fig.4s	WT+Veh	4	F
	5XFAD+Veh	4	F	5XFAD+Veh vs. WT+Veh	0.0098	One-way ANOVA with post hoc Dunnett’s test
	5XFAD+Rim	4	F	5XFAD+Veh vs. 5XFAD+Rim	0.036	One-way ANOVA with post hoc Dunnett’s test
	WT+Veh	3	M
	5XFAD+Veh	3	M	5XFAD+Veh vs. WT+Veh	0.3714	One-way ANOVA with post hoc Dunnett’s test
	5XFAD+Rim	3	M	5XFAD+Veh vs. 5XFAD+Rim	0.4568	One-way ANOVA with post hoc Dunnett’s test
Fig.4u	WT+Veh	4	F
	5XFAD+Veh	4	F	5XFAD+Veh vs. WT+Veh	0.0048
	5XFAD+Rim	4	F	5XFAD+Veh vs. 5XFAD+Rim	0.0429
	WT+Veh	3	M
	5XFAD+Veh	3	M	5XFAD+Veh vs. WT+Veh	0.0544
	5XFAD+Rim	3	M	5XFAD+Veh vs. 5XFAD+Rim	0.3092
Fig.4v	WT+Veh	4	F
	5XFAD+Veh	4	F
	5XFAD+Rim	4	F		0.015	Spearman method
Fig.4w	WT+Veh	3	M
	5XFAD+Veh	3	M
	5XFAD+Rim	3	M		0.0031	Spearman method
Fig.5e	siRNA-control	6	F
	siRNA-Hdac11	6	F	siRNA-control vs. siRNA-Hdac11	0.0014	two-tailed Student’s t-tests
	siRNA-control	4	M
	siRNA-Hdac11	5	M	siRNA-control vs. siRNA-Hdac11	0.0038	two-tailed Student’s t-tests
Fig.5f	siRNA-control	11	F
	siRNA-Hdac11	11	F	siRNA-control vs. siRNA-Hdac11	0.0066	two-tailed Student’s t-tests
	siRNA-control	7	M
	siRNA-Hdac11	10	M	siRNA-control vs. siRNA-Hdac11	0.5843	two-tailed Student’s t-tests
Fig.5g	siRNA-control	10	F
	siRNA-Hdac11	10	F	siRNA-control vs. siRNA-Hdac11	0.5608	two-tailed Student’s t-tests
	siRNA-control	7	M
	siRNA-Hdac11	10	M	siRNA-control vs. siRNA-Hdac11	0.3652	two-tailed Student’s t-tests
Fig.5h	siRNA-control	11	F
	siRNA-Hdac11	11	F	siRNA-control vs. siRNA-Hdac11	0.034	two-tailed Student’s t-tests
	siRNA-control	7	M
	siRNA-Hdac11	10	M	siRNA-control vs. siRNA-Hdac11	0.7796	two-tailed Student’s t-tests
Fig.5i	siRNA-control	11	F
	siRNA-Hdac11	11	F	siRNA-control vs. siRNA-Hdac11	0.9368	two-tailed Student’s t-tests
	siRNA-control	7	M
	siRNA-Hdac11	10	M	siRNA-control vs. siRNA-Hdac11	0.7796	two-tailed Student’s t-tests
Fig.5j	siRNA-control	11	F	Total entries
	siRNA-Hdac11	11	F	siRNA-control vs. siRNA-Hdac11	0.7261	two-tailed Student’s t-tests
	siRNA-control	7	M	siRNA-control vs. siRNA-Hdac11	0.5445	two-tailed Student’s t-tests
	siRNA-Hdac11	10	M
				Alternation
				siRNA-control vs. siRNA-Hdac11	0.0068	two-tailed Student’s t-tests
				siRNA-control vs. siRNA-Hdac11	0.0085	two-tailed Student’s t-tests
Fig.5l	siRNA-control	10	F
	siRNA-Hdac11	11	F	siRNA-control vs. siRNA-Hdac11	0.0227	two-tailed Student’s t-tests
	siRNA-control	7	M
	siRNA-Hdac11	10	M	siRNA-control vs. siRNA-Hdac11	0.9446	two-tailed Student’s t-tests
Fig.5m	siRNA-control	10	F
	siRNA-Hdac11	11	F	Number of crossings
	siRNA-control	7	M	siRNA-control vs. siRNA-Hdac11	0.0095	two-tailed Student’s t-tests
	siRNA-Hdac11	10	M	siRNA-control vs. siRNA-Hdac11	0.2314	two-tailed Student’s t-tests
				Time in target quadrant
				siRNA-control vs. siRNA-Hdac11	0.0193	two-tailed Student’s t-tests
				siRNA-control vs. siRNA-Hdac11	0.0029	two-tailed Student’s t-tests
Fig.5o	siRNA-control	6	F
	siRNA-Hdac11	6	F	siRNA-control vs. siRNA-Hdac11	0.0219	two-tailed Student’s t-tests
	siRNA-control	4	M
	siRNA-Hdac11	5	M	siRNA-control vs. siRNA-Hdac11	0.0241	two-tailed Student’s t-tests
Fig.5p	siRNA-control	6	F
	siRNA-Hdac11	6	F	siRNA-control vs. siRNA-Hdac11	0.0016	two-tailed Student’s t-tests
	siRNA-control	4	M
	siRNA-Hdac11	5	M	siRNA-control vs. siRNA-Hdac11	0.0216	two-tailed Student’s t-tests
Fig.5r	siRNA-control	6	F
	siRNA-Hdac11	6	F	siRNA-control vs. siRNA-Hdac11	0.004	two-tailed Student’s t-tests
	siRNA-control	4	M
	siRNA-Hdac11	5	M	siRNA-control vs. siRNA-Hdac11	0.0412	two-tailed Student’s t-tests
Fig.5s	siRNA-control	6	F
	siRNA-Hdac11	6	F	siRNA-control vs. siRNA-Hdac11	0.0098	two-tailed Student’s t-tests
	siRNA-control	4	M
	siRNA-Hdac11	5	M	siRNA-control vs. siRNA-Hdac11	0.3212	two-tailed Student’s t-tests
Fig.5t	siRNA-control	6	F
	siRNA-Hdac11	6	F	App
	siRNA-control	4	M	F: siRNA-control vs. siRNA-Hdac11	0.0104	two-tailed Student’s t-tests
	siRNA-Hdac11	5	M	M: siRNA-control vs. siRNA-Hdac11	0.0483	two-tailed Student’s t-tests
				Gfap
				F: siRNA-control vs. siRNA-Hdac11	0.0002	two-tailed Student’s t-tests
				M: siRNA-control vs. siRNA-Hdac11	0.021	two-tailed Student’s t-tests
				Iba1
				F: siRNA-control vs. siRNA-Hdac11	0.028	two-tailed Student’s t-tests
				M: siRNA-control vs. siRNA-Hdac11	0.0202	two-tailed Student’s t-tests
				P-tau(Ser396)/Tau
				F: siRNA-control vs. siRNA-Hdac11	0.0469	two-tailed Student’s t-tests
				M: siRNA-control vs. siRNA-Hdac11	0.0462	two-tailed Student’s t-tests
Fig.5u	siRNA-control	6(60 microglia)	F
	siRNA-Hdac11	6(60 microglia)	F	siRNA-control vs. siRNA-Hdac11	0.0001	two-tailed Student’s t-tests
	siRNA-control	4(40 microglia)	M
	siRNA-Hdac11	5(50 microglia)	M	siRNA-control vs. siRNA-Hdac11	0.0008	two-tailed Student’s t-tests
Fig.6l	WT	3	F
	Calca-/-	3	F	Input: Hdac11
	WT/IgG	3	F	WT vs.Calca-/-	0.0196	two-tailed Student’s t-tests
				Input: LXRβ
				WT vs.Calca-/-	0.5736	two-tailed Student’s t-tests
				Input: Abca1
				WT vs.Calca-/-	0.0045	two-tailed Student’s t-tests
				IB: LXRβ
				WT vs.Calca-/-	0.0348	two-tailed Student’s t-tests
				IB: AcLXRβ
				WT vs.Calca-/-	0.0101	two-tailed Student’s t-tests
Fig.6n	siRNA-control	6	F
	siRNA-Hdac11	6	F	siRNA-control vs. siRNA-Hdac11	0.459	two-tailed Student’s t-tests
	siRNA-control	4	M
	siRNA-Hdac11	5	M	siRNA-control vs. siRNA-Hdac11	0.6106	two-tailed Student’s t-tests
Fig.6o	siRNA-control	6	F
	siRNA-Hdac11	6	F	siRNA-control vs. siRNA-Hdac11	0.002	two-tailed Student’s t-tests
	siRNA-control	4	M
	siRNA-Hdac11	5	M	siRNA-control vs. siRNA-Hdac11	0.0149	two-tailed Student’s t-tests
Fig.6p	siRNA-control	6	F
	siRNA-Hdac11	6	F	siRNA-control vs. siRNA-Hdac11	0.0071	two-tailed Student’s t-tests
	siRNA-control	4	M
	siRNA-Hdac11	5	M	siRNA-control vs. siRNA-Hdac11	0.0121	two-tailed Student’s t-tests
Fig.6s	No dementia	6	3F/3M
	Dementia	6	3F/3M	No dementia vs. Dementia	0.034	two-tailed Student’s t-tests
Fig.6t	No dementia	6	3F/3M
	Dementia	6	3F/3M	No dementia vs. Dementia	0.0065	two-tailed Student’s t-tests
Fig.6u	siRNA-control	6	F
	siRNA-Hdac11	6	F
	siRNA-control	4	M
	siRNA-Hdac11	5	M	Mice	0.0028	Spearman method
	No dementia	6	3F/3M
	Dementia	6	3F/3M	Human	0.035	Spearman method
Fig.E1h	WT	6	F
	5XFAD	6	F	0.0091		two-tailed Student’s t-tests
	WT	6	M
	5XFAD	6	M	0.0157		two-tailed Student’s t-tests
Fig.E1l	Veh+WT	4
	Veh+Calaca-/-	3		Veh+WT vs. Veh+Calaca-/-	0.6015	two-tailed Student’s t-tests
	sAβ42+Rim(0μM)	4		Veh+WT vs.s Aβ42+Rim(0μM)	<0.0001	One-way ANOVA with post hoc Dunnett’s test
	sAβ42+Rim(0.01μM)	4		sAβ42+Rim(0μM) vs. sAβ42+Rim(0.01μM)	0.9997	One-way ANOVA with post hoc Dunnett’s test
	sAβ42+Rim(0.1μM)	4		sAβ42+Rim(0μM) vs. sAβ42+Rim(0.1μM)	0.0384	One-way ANOVA with post hoc Dunnett’s test
	sAβ42+Rim(1μM)	4		sAβ42+Rim(0μM) vs. sAβ42+Rim(1μM)	0.0003	One-way ANOVA with post hoc Dunnett’s test
	sAβ42+Rim(10μM)	4		sAβ42+Rim(0μM) vs. sAβ42+Rim(10μM)	0.9958	One-way ANOVA with post hoc Dunnett’s test
	sAβ42+Rim(100μM)	4		sAβ42+Rim(0μM) vs. sAβ42+Rim(100μM)	0.991	One-way ANOVA with post hoc Dunnett’s test
	sAβ42+Calaca-/-	3		sAβ42+Rim(0μM) vs. sAβ42+Calca-/-	0.0051	two-tailed Student’s t-tests
				Veh+Calaca-/- vs. sAβ42+Calca-/-	0.1494	two-tailed Student’s t-tests
Fig.E1m	Veh+WT	3
	Veh+Calaca-/-	3		Veh+WT vs. Veh+Calaca-/-	0.0936	two-tailed Student’s t-tests
	sAβ42	3		Veh+WT vs. sAβ42	<0.0001	One-way ANOVA with post hoc Dunnett’s test
	sAβ42+Rim	3		sAβ42 vs. sAβ42+Rim	0.0025	One-way ANOVA with post hoc Dunnett’s test
	sAβ42+Calaca-/-	3		sAβ42 vs. sAβ42+Calaca-/-	0.0006	two-tailed Student’s t-tests
Fig.E1n	Veh+WT	3		Il-1β
	Veh+Calaca-/-	3		Veh+WT vs. Veh+Calaca-/-	0.4813	two-tailed Student’s t-tests
	sAβ42	3		Veh+WT vs. sAβ42	<0.0001	One-way ANOVA with post hoc Dunnett’s test
	sAβ42+Rim	3		sAβ42 vs. sAβ42+Rim	0.0004	One-way ANOVA with post hoc Dunnett’s test
	sAβ42+Calaca-/-	3		sAβ42 vs. sAβ42+Calaca-/-	0.0004	two-tailed Student’s t-tests
				iNOS
				Veh+WT vs. Veh+Calaca-/-	0.5957	two-tailed Student’s t-tests
				Veh+WT vs. sAβ42	0.0007	One-way ANOVA with post hoc Dunnett’s test
				sAβ42 vs. sAβ42+Rim	0.0092	One-way ANOVA with post hoc Dunnett’s test
				sAβ42 vs. sAβ42+Calaca-/-	0.0432	two-tailed Student’s t-tests
				Il-6
				Veh+WT vs. Veh+Calaca-/-	0.9375	two-tailed Student’s t-tests
				Veh+WT vs. sAβ42	0.0215	One-way ANOVA with post hoc Dunnett’s test
				sAβ42 vs. sAβ42+Rim	0.9355	One-way ANOVA with post hoc Dunnett’s test
				sAβ42 vs. sAβ42+Calaca-/-	0.0478	two-tailed Student’s t-tests
				Tnf-α
				Veh+WT vs. Veh+Calaca-/-	0.7013	two-tailed Student’s t-tests
				Veh+WT vs. sAβ42	0.5028	One-way ANOVA with post hoc Dunnett’s test
				sAβ42 vs. sAβ42+Rim	0.2391	One-way ANOVA with post hoc Dunnett’s test
				sAβ42 vs. sAβ42+Calaca-/-	0.4787	two-tailed Student’s t-tests
Fig.E1p	DMSO	54–61
	Rim-0.4μM	54–61		DMSO vs. Rim-0.4μM	0.4883	Gehan-Breslow-Wilcoxon Test
	Rim-2μM	54–61		DMSO vs. Rim-2μM	0.0468	Gehan-Breslow-Wilcoxon Test
	Rim-10μM	54–61		DMSO vs. Rim-10μM	0.219	Gehan-Breslow-Wilcoxon Test
Fig.E2b	WT+Veh	6	F
	5XFAD+Veh	6	F	5XFAD+Veh vs. WT+Veh	<0.0001	One-way ANOVA with post hoc Dunnett’s test
	5XFAD+Rim	6	F	5XFAD+Veh vs. 5XFAD+Rim	0.3672	One-way ANOVA with post hoc Dunnett’s test
	WT+Veh	6	M
	5XFAD+Veh	6	M	5XFAD+Veh vs. WT+Veh	<0.0001	One-way ANOVA with post hoc Dunnett’s test
	5XFAD+Rim	6	M	5XFAD+Veh vs. 5XFAD+Rim	0.2105	One-way ANOVA with post hoc Dunnett’s test
Fig.E2c	WT+Veh	6	F
	5XFAD+Veh	6	F	5XFAD+Veh vs. WT+Veh	<0.0001	One-way ANOVA with post hoc Dunnett’s test
	5XFAD+Rim	6	F	5XFAD+Veh vs. 5XFAD+Rim	0.0311	One-way ANOVA with post hoc Dunnett’s test
	WT+Veh	6	M
	5XFAD+Veh	6	M	5XFAD+Veh vs. WT+Veh	0.0003	One-way ANOVA with post hoc Dunnett’s test
	5XFAD+Rim	6	M	5XFAD+Veh vs. 5XFAD+Rim	0.8653	One-way ANOVA with post hoc Dunnett’s test
Fig.E2d	WT+Veh	3	F
	5XFAD+Veh	4	F	5XFAD+Veh vs. WT+Veh	0.0029	One-way ANOVA with post hoc Dunnett’s test
	5XFAD+Rim	4	F	5XFAD+Veh vs. 5XFAD+Rim	0.1422	One-way ANOVA with post hoc Dunnett’s test
	WT+Veh	3	M
	5XFAD+Veh	4	M	5XFAD+Veh vs. WT+Veh	0.033	One-way ANOVA with post hoc Dunnett’s test
	5XFAD+Rim	4	M	5XFAD+Veh vs. 5XFAD+Rim	0.1746	One-way ANOVA with post hoc Dunnett’s test
Fig.E2e	WT+Veh	3	F
	5XFAD+Veh	4	F	5XFAD+Veh vs. WT+Veh	0.0034	One-way ANOVA with post hoc Dunnett’s test
	5XFAD+Rim	4	F	5XFAD+Veh vs. 5XFAD+Rim	0.0255	One-way ANOVA with post hoc Dunnett’s test
	WT+Veh	3	M
	5XFAD+Veh	4	M	5XFAD+Veh vs. WT+Veh	0.0007	One-way ANOVA with post hoc Dunnett’s test
	5XFAD+Rim	4	M	5XFAD+Veh vs. 5XFAD+Rim	0.1521	One-way ANOVA with post hoc Dunnett’s test
Fig.E2f	WT+Veh	3	F
	5XFAD+Veh	4	F	5XFAD+Veh vs. WT+Veh	0.0012	One-way ANOVA with post hoc Dunnett’s test
	5XFAD+Rim	4	F	5XFAD+Veh vs. 5XFAD+Rim	0.2461	One-way ANOVA with post hoc Dunnett’s test
	WT+Veh	3	M
	5XFAD+Veh	4	M	5XFAD+Veh vs. WT+Veh	0.0139	One-way ANOVA with post hoc Dunnett’s test
	5XFAD+Rim	4	M	5XFAD+Veh vs. 5XFAD+Rim	0.9916	One-way ANOVA with post hoc Dunnett’s test
Fig.E2g	WT+Veh	3	F
	5XFAD+Veh	4	F	5XFAD+Veh vs. WT+Veh	0.0004	One-way ANOVA with post hoc Dunnett’s test
	5XFAD+Rim	4	F	5XFAD+Veh vs. 5XFAD+Rim	0.0109	One-way ANOVA with post hoc Dunnett’s test
	WT+Veh	3	M
	5XFAD+Veh	4	M	5XFAD+Veh vs. WT+Veh	0.0022	One-way ANOVA with post hoc Dunnett’s test
	5XFAD+Rim	4	M	5XFAD+Veh vs. 5XFAD+Rim	0.0629	One-way ANOVA with post hoc Dunnett’s test
Fig.E2i	WT+Veh	6	F	Microglia
	5XFAD+Veh	6	F	F: 5XFAD+Veh vs. WT+Veh	<0.0001	One-way ANOVA with post hoc Dunnett’s test
	5XFAD+Rim	6	F	F: 5XFAD+Veh vs. 5XFAD+Rim	0.0058	One-way ANOVA with post hoc Dunnett’s test
	WT+Veh	6	M	M: 5XFAD+Veh vs. WT+Veh	0.0656	One-way ANOVA with post hoc Dunnett’s test
	5XFAD+Veh	6	M	M: 5XFAD+Veh vs. 5XFAD+Rim	0.125	One-way ANOVA with post hoc Dunnett’s test
	5XFAD+Rim	6	M	DAM
				F: 5XFAD+Veh vs. WT+Veh	<0.0001	One-way ANOVA with post hoc Dunnett’s test
				F: 5XFAD+Veh vs. 5XFAD+Rim	<0.0001	One-way ANOVA with post hoc Dunnett’s test
				M: 5XFAD+Veh vs. WT+Veh	<0.0001	One-way ANOVA with post hoc Dunnett’s test
				M: 5XFAD+Veh vs. 5XFAD+Rim	0.0128	One-way ANOVA with post hoc Dunnett’s test
				Astrocytes
				F: 5XFAD+Veh vs. WT+Veh	<0.0001	One-way ANOVA with post hoc Dunnett’s test
				F: 5XFAD+Veh vs. 5XFAD+Rim	0.0054	One-way ANOVA with post hoc Dunnett’s test
				M: 5XFAD+Veh vs. WT+Veh	<0.0001	One-way ANOVA with post hoc Dunnett’s test
				M: 5XFAD+Veh vs. 5XFAD+Rim	0.0032	One-way ANOVA with post hoc Dunnett’s test
				DAA
				F: 5XFAD+Veh vs. WT+Veh	<0.0001	One-way ANOVA with post hoc Dunnett’s test
				F: 5XFAD+Veh vs. 5XFAD+Rim	0.0192	One-way ANOVA with post hoc Dunnett’s test
				M: 5XFAD+Veh vs. WT+Veh	<0.0001	One-way ANOVA with post hoc Dunnett’s test
				M: 5XFAD+Veh vs. 5XFAD+Rim	0.0336	One-way ANOVA with post hoc Dunnett’s test
Fig.E2k	WT+Veh	6	F	App
	5XFAD+Veh	6	F	F: 5XFAD+Veh vs. WT+Veh	0.0002	One-way ANOVA with post hoc Dunnett’s test
	5XFAD+Rim	6	F	F: 5XFAD+Veh vs. 5XFAD+Rim	0.0781	One-way ANOVA with post hoc Dunnett’s test
	WT+Veh	6	M	M: 5XFAD+Veh vs. WT+Veh	0.0017	One-way ANOVA with post hoc Dunnett’s test
	5XFAD+Veh	6	M	M: 5XFAD+Veh vs. 5XFAD+Rim	0.8631	One-way ANOVA with post hoc Dunnett’s test
	5XFAD+Rim	6	M	Gfap
				F: 5XFAD+Veh vs. WT+Veh	0.0004	One-way ANOVA with post hoc Dunnett’s test
				F: 5XFAD+Veh vs. 5XFAD+Rim	0.0078	One-way ANOVA with post hoc Dunnett’s test
				M: 5XFAD+Veh vs. WT+Veh	0.0001	One-way ANOVA with post hoc Dunnett’s test
				M: 5XFAD+Veh vs. 5XFAD+Rim	0.1156	One-way ANOVA with post hoc Dunnett’s test
				Iba1
				F: 5XFAD+Veh vs. WT+Veh	0.0008	One-way ANOVA with post hoc Dunnett’s test
				F: 5XFAD+Veh vs. 5XFAD+Rim	0.0236	One-way ANOVA with post hoc Dunnett’s test
				M: 5XFAD+Veh vs. WT+Veh	0.9155	One-way ANOVA with post hoc Dunnett’s test
				M: 5XFAD+Veh vs. 5XFAD+Rim	0.9985	One-way ANOVA with post hoc Dunnett’s test
Fig.E2l	WT+Veh	6	F
	5XFAD+Veh	6	F	5XFAD+Veh vs. WT+Veh	0.0162	One-way ANOVA with post hoc Dunnett’s test
	5XFAD+Rim	6	F	5XFAD+Veh vs. 5XFAD+Rim	0.9388	One-way ANOVA with post hoc Dunnett’s test
	WT+Veh	6	M
	5XFAD+Veh	6	M	5XFAD+Veh vs. WT+Veh	0.8755	One-way ANOVA with post hoc Dunnett’s test
	5XFAD+Rim	6	M	5XFAD+Veh vs. 5XFAD+Rim	0.9199	One-way ANOVA with post hoc Dunnett’s test
Fig.E2n	WT+Veh	6	F
	5XFAD+Veh	6	F	5XFAD+Veh vs. WT+Veh	<0.0001	One-way ANOVA with post hoc Dunnett’s test
	5XFAD+Rim	6	F	5XFAD+Veh vs. 5XFAD+Rim	0.0469	One-way ANOVA with post hoc Dunnett’s test
	WT+Veh	6	M
	5XFAD+Veh	6	M	5XFAD+Veh vs. WT+Veh	<0.0001	One-way ANOVA with post hoc Dunnett’s test
	5XFAD+Rim	6	M	5XFAD+Veh vs. 5XFAD+Rim	0.0056	One-way ANOVA with post hoc Dunnett’s test
Fig.E2p	WT+Veh	6	F
	5XFAD+Veh	6	F	5XFAD+Veh vs. WT+Veh	<0.0001	One-way ANOVA with post hoc Dunnett’s test
	5XFAD+Rim	6	F	5XFAD+Veh vs. 5XFAD+Rim	0.0042	One-way ANOVA with post hoc Dunnett’s test
	WT+Veh	6	M
	5XFAD+Veh	6	M	5XFAD+Veh vs. WT+Veh	<0.0001	One-way ANOVA with post hoc Dunnett’s test
	5XFAD+Rim	6	M	5XFAD+Veh vs. 5XFAD+Rim	0.2587	One-way ANOVA with post hoc Dunnett’s test
Fig.E2r	WT+Veh	6 (60 microglia)	F		<0.0001	One-way ANOVA with post hoc Dunnett’s test
	5XFAD+Veh	6 (60 microglia)	F	5XFAD+Veh vs. WT+Veh	0.0007	One-way ANOVA with post hoc Dunnett’s test
	5XFAD+Rim	6 (60 microglia)	F	5XFAD+Veh vs. 5XFAD+Rim
	WT+Veh	6 (60 microglia)	M		<0.0001	One-way ANOVA with post hoc Dunnett’s test
	5XFAD+Veh	6 (60 microglia)	M	5XFAD+Veh vs. WT+Veh	0.0029	One-way ANOVA with post hoc Dunnett’s test
	5XFAD+Rim	6 (60 microglia)	M	5XFAD+Veh vs. 5XFAD+Rim
Fig.E2t	WT+Veh	6 (60 microglia)	F
	5XFAD+Veh	6 (60 microglia)	F		<0.0001	One-way ANOVA with post hoc Dunnett’s test
	5XFAD+Rim	6 (60 microglia)	F		0.0039	One-way ANOVA with post hoc Dunnett’s test
	WT+Veh	6 (60 microglia)	M
	5XFAD+Veh	6 (60 microglia)	M		<0.0001	One-way ANOVA with post hoc Dunnett’s test
	5XFAD+Rim	6 (60 microglia)	M		0.0015	One-way ANOVA with post hoc Dunnett’s test
Fig.E2u	WT+Veh	3_4	F	Il1-β
	5XFAD+Veh	3_4	F	F: 5XFAD+Veh vs. WT+Veh	0.0143	One-way ANOVA with post hoc Dunnett’s test
	5XFAD+Rim	3_4	F	M: 5XFAD+Veh vs. 5XFAD+Rim	0.0038	One-way ANOVA with post hoc Dunnett’s test
	WT+Veh	3	M	F: 5XFAD+Veh vs. WT+Veh	0.1581	One-way ANOVA with post hoc Dunnett’s test
	5XFAD+Veh	3	M	M: 5XFAD+Veh vs. 5XFAD+Rim	0.1477	One-way ANOVA with post hoc Dunnett’s test
	5XFAD+Rim	3	M
				Tnf-α
				F: 5XFAD+Veh vs. WT+Veh	0.6725	One-way ANOVA with post hoc Dunnett’s test
				M: 5XFAD+Veh vs. 5XFAD+Rim	0.9863	One-way ANOVA with post hoc Dunnett’s test
				F: 5XFAD+Veh vs. WT+Veh	0.0117	One-way ANOVA with post hoc Dunnett’s test
				M: 5XFAD+Veh vs. 5XFAD+Rim	0.0473	One-way ANOVA with post hoc Dunnett’s test
				Il6
				F: 5XFAD+Veh vs. WT+Veh	0.2134	One-way ANOVA with post hoc Dunnett’s test
				M: 5XFAD+Veh vs. 5XFAD+Rim	0.6073	One-way ANOVA with post hoc Dunnett’s test
				F: 5XFAD+Veh vs. WT+Veh	0.036	One-way ANOVA with post hoc Dunnett’s test
				M: 5XFAD+Veh vs. 5XFAD+Rim	0.0288	One-way ANOVA with post hoc Dunnett’s test
				Il4
				F: 5XFAD+Veh vs. WT+Veh	0.2245	One-way ANOVA with post hoc Dunnett’s test
				M: 5XFAD+Veh vs. 5XFAD+Rim	0.4568	One-way ANOVA with post hoc Dunnett’s test
				F: 5XFAD+Veh vs. WT+Veh	0.0273	One-way ANOVA with post hoc Dunnett’s test
				M: 5XFAD+Veh vs. 5XFAD+Rim	0.0491	One-way ANOVA with post hoc Dunnett’s test
				Tgf-β
				F: 5XFAD+Veh vs. WT+Veh	0.0807	One-way ANOVA with post hoc Dunnett’s test
				M: 5XFAD+Veh vs. 5XFAD+Rim	0.0394	One-way ANOVA with post hoc Dunnett’s test
				F: 5XFAD+Veh vs. WT+Veh	0.8059	One-way ANOVA with post hoc Dunnett’s test
				M: 5XFAD+Veh vs. 5XFAD+Rim	0.6122	One-way ANOVA with post hoc Dunnett’s test
Fig.E2v	WT+Veh	4	F	Il1-β
	5XFAD+Veh	4	F	F: 5XFAD+Veh vs. WT+Veh	0.0803	One-way ANOVA with post hoc Dunnett’s test
	5XFAD+Rim	4	F	M: 5XFAD+Veh vs. 5XFAD+Rim	0.1744	One-way ANOVA with post hoc Dunnett’s test
	WT+Veh	3	M	F: 5XFAD+Veh vs. WT+Veh	0.0677	One-way ANOVA with post hoc Dunnett’s test
	5XFAD+Veh	3	M	M: 5XFAD+Veh vs. 5XFAD+Rim	0.2382	One-way ANOVA with post hoc Dunnett’s test
	5XFAD+Rim	3	M
				Tnf-α
				F: 5XFAD+Veh vs. WT+Veh	0.8983	One-way ANOVA with post hoc Dunnett’s test
				M: 5XFAD+Veh vs. 5XFAD+Rim	0.0604	One-way ANOVA with post hoc Dunnett’s test
				F: 5XFAD+Veh vs. WT+Veh	0.272	One-way ANOVA with post hoc Dunnett’s test
				M: 5XFAD+Veh vs. 5XFAD+Rim	0.939	One-way ANOVA with post hoc Dunnett’s test
				Il6
				F: 5XFAD+Veh vs. WT+Veh	<0.0001	One-way ANOVA with post hoc Dunnett’s test
				M: 5XFAD+Veh vs. 5XFAD+Rim	0.008	One-way ANOVA with post hoc Dunnett’s test
				F: 5XFAD+Veh vs. WT+Veh	0.4965	One-way ANOVA with post hoc Dunnett’s test
				M: 5XFAD+Veh vs. 5XFAD+Rim	0.5654	One-way ANOVA with post hoc Dunnett’s test
				Il4
				F: 5XFAD+Veh vs. WT+Veh	0.0369	One-way ANOVA with post hoc Dunnett’s test
				M: 5XFAD+Veh vs. 5XFAD+Rim	0.9013	One-way ANOVA with post hoc Dunnett’s test
				F: 5XFAD+Veh vs. WT+Veh	0.9752	One-way ANOVA with post hoc Dunnett’s test
				M: 5XFAD+Veh vs. 5XFAD+Rim	0.1785	One-way ANOVA with post hoc Dunnett’s test
				Tgf-β
				F: 5XFAD+Veh vs. WT+Veh	0.0024	One-way ANOVA with post hoc Dunnett’s test
				M: 5XFAD+Veh vs. 5XFAD+Rim	0.0471	One-way ANOVA with post hoc Dunnett’s test
				F: 5XFAD+Veh vs. WT+Veh	0.5282	One-way ANOVA with post hoc Dunnett’s test
				M: 5XFAD+Veh vs. 5XFAD+Rim	0.0864	One-way ANOVA with post hoc Dunnett’s test
Fig.6g	CTR	3
	sAβ42	3		CTR vs. sAβ42	0.0003	One-way ANOVA with post hoc Dunnett’s test
	sAβ42+Rim	3		sAβ42 vs. sAβ42+Rim	0.0113	One-way ANOVA with post hoc Dunnett’s test
Fig.6h	CTR	3
	sAβ42	3		CTR vs. sAβ42	0.0024	One-way ANOVA with post hoc Dunnett’s test
	sAβ42+Rim	3		sAβ42 vs. sAβ42+Rim	0.2618	One-way ANOVA with post hoc Dunnett’s test
Fig.6j	Veh	3
	sAβ42+Ele(0μM)	3		CTR vs. sAβ42+Ele(0μM)	<0.0001	One-way ANOVA with post hoc Dunnett’s test
	sAβ42+Ele(0.1μM)	3		sAβ42+Ele(0μM) vs. sAβ42+Ele(0.1μM)	0.9998	One-way ANOVA with post hoc Dunnett’s test
	sAβ42+Ele(1μM)	3		sAβ42+Ele(0μM) vs. sAβ42+Ele(1μM)	0.8309	One-way ANOVA with post hoc Dunnett’s test
	sAβ42+Ele(10μM)	3		sAβ42+Ele(0μM) vs. sAβ42+Ele(10μM)	0.015	One-way ANOVA with post hoc Dunnett’s test
	sAβ42+Ele(100μM)	3		sAβ42+Ele(0μM) vs. sAβ42+Ele(100μM)	>0.9999	One-way ANOVA with post hoc Dunnett’s test
Fig.E6l	CTR	3
	sAβ42	3		CTR vs. sAβ42	<0.0001	One-way ANOVA with post hoc Dunnett’s test
	sAβ42+Ele	3		sAβ42 vs. sAβ42+Ele	0.005	One-way ANOVA with post hoc Dunnett’s test
Fig.E6n	DMSO	54–61
	Ele-4μM	54–61		DMSO vs. Ele-4μM	0.0177	Gehan-Breslow-Wilcoxon Test
	Ele-20μM	54–61		DMSO vs. Ele-20μM	0.0097	Gehan-Breslow-Wilcoxon Test
	Ele-100μM	54–61		DMSO vs. Ele-100μM	0.5527	Gehan-Breslow-Wilcoxon Test
Fig.E7c	5XFAD+Veh	3	F
	5XFAD+Ele	3	F	5XFAD+Veh vs. 5XFAD+Ele	0.6339	two-tailed Student’s t-tests
	5XFAD+Veh	3	M
	5XFAD+Ele	3	M	5XFAD+Veh vs. 5XFAD+Ele	0.8007	two-tailed Student’s t-tests
Fig.E7d	5XFAD+Veh	3	F
	5XFAD+Ele	3	F	5XFAD+Veh vs. 5XFAD+Ele	0.6995	two-tailed Student’s t-tests
	5XFAD+Veh	3	M
	5XFAD+Ele	3	M	5XFAD+Veh vs. 5XFAD+Ele	0.9721	two-tailed Student’s t-tests
Fig.E7f	5XFAD+Veh	3	F
	5XFAD+Ele	3	F	5XFAD+Veh vs. 5XFAD+Ele	0.0109	two-tailed Student’s t-tests
	5XFAD+Veh	3	M
	5XFAD+Ele	3	M	5XFAD+Veh vs. 5XFAD+Ele	0.4213	two-tailed Student’s t-tests
Fig.E7g	5XFAD+Veh	3	F
	5XFAD+Ele	3	F	5XFAD+Veh vs. 5XFAD+Ele	0.9767	two-tailed Student’s t-tests
	5XFAD+Veh	3	M
	5XFAD+Ele	3	M	5XFAD+Veh vs. 5XFAD+Ele	0.9796	two-tailed Student’s t-tests
Fig.E7i	5XFAD+Veh	3	F
	5XFAD+Ele	3	F	5XFAD+Veh vs. 5XFAD+Ele	0.7309	two-tailed Student’s t-tests
	5XFAD+Veh	3	M
	5XFAD+Ele	3	M	5XFAD+Veh vs. 5XFAD+Ele	0.9985	two-tailed Student’s t-tests
Fig.E7j	5XFAD+Veh	3	F	App
	5XFAD+Ele	3	F	5XFAD+Veh vs. 5XFAD+Ele	0.8233	two-tailed Student’s t-tests
	5XFAD+Veh	3	M	5XFAD+Veh vs. 5XFAD+Ele	0.3192	two-tailed Student’s t-tests
	5XFAD+Ele	3	M
				Hdac11
				5XFAD+Veh vs. 5XFAD+Ele	0.5738	two-tailed Student’s t-tests
				5XFAD+Veh vs. 5XFAD+Ele	0.317	two-tailed Student’s t-tests
				Gfap
				5XFAD+Veh vs. 5XFAD+Ele	0.0336	two-tailed Student’s t-tests
				5XFAD+Veh vs. 5XFAD+Ele	0.166	two-tailed Student’s t-tests
				Iba1
				5XFAD+Veh vs. 5XFAD+Ele	0.4809	two-tailed Student’s t-tests
				5XFAD+Veh vs. 5XFAD+Ele	0.8499	two-tailed Student’s t-tests
Fig.E9b	Veh/Cell lysate	3
	sAβ-42/Cell lysate	3		Veh/Cell lysate vs. sAβ-42/Cell lysate	0.1245	two-tailed Student’s t-tests
	Veh/Supernatant	3
	sAβ-42/Supernatant	3		Veh/Supernatant vs. sAβ-42/Supernatant	0.0079	two-tailed Student’s t-tests
Fig.E9C	WT/Veh	3
	Calca-/-/Veh	3		Hdac11
	WT/sAβ-42	3		WT/Veh vs. WT/sAβ-42	0.0001	two-way ANOVA followed by Bonferroni multiple comparisons
	Calca-/-/sAβ-42	3		Calca-/-/Veh vs. Calca-/-/sAβ-42	0.0015	two-way ANOVA followed by Bonferroni multiple comparisons
				WT/Veh vs. Calca-/-/Veh	0.0005	two-way ANOVA followed by Bonferroni multiple comparisons
				WT/sAβ-42 vs. Calca-/-/sAβ-42	<0.0001	two-way ANOVA followed by Bonferroni multiple comparisons
				Abca1
				WT/Veh vs. WT/sAβ-42	0.0019	two-way ANOVA followed by Bonferroni multiple comparisons
				Calca-/-/Veh vs. Calca-/-/sAβ-42	0.0009	two-way ANOVA followed by Bonferroni multiple comparisons
				WT/Veh vs. Calca-/-/Veh	0.0158	two-way ANOVA followed by Bonferroni multiple comparisons
				WT/sAβ-42 vs. Calca-/-/sAβ-42	0.0396	two-way ANOVA followed by Bonferroni multiple comparisons
Fig.E9d	WT/Veh	3
	Calca-/-/Veh	3		WT/Veh vs. WT/sAβ-42	<0.0001	two-way ANOVA followed by Bonferroni multiple comparisons
	WT/sAβ-42	3		Calca-/-/Veh vs. Calca-/-/sAβ-42	<0.0001	two-way ANOVA followed by Bonferroni multiple comparisons
	Calca-/-/sAβ-42	3		WT/Veh vs. Calca-/-/Veh	0.001	two-way ANOVA followed by Bonferroni multiple comparisons
				WT/sAβ-42 vs. Calca-/-/sAβ-42	0.0022	two-way ANOVA followed by Bonferroni multiple comparisons
Fig.E9e	WT/Veh	3(30primary neuron)
	Calca-/-/Veh	3(30primary neuron)		WT/Veh vs. WT/sAβ-42	<0.0001	two-way ANOVA followed by Bonferroni multiple comparisons
	WT/sAβ-42	3(30primary neuron)		Calca-/-/Veh vs. Calca-/-/sAβ-42	<0.0001	two-way ANOVA followed by Bonferroni multiple comparisons
	Calca-/-/sAβ-42	3(30primary neuron)		WT/Veh vs. Calca-/-/Veh	0.0046	two-way ANOVA followed by Bonferroni multiple comparisons
				WT/sAβ-42 vs. Calca-/-/sAβ-42	0.0055	two-way ANOVA followed by Bonferroni multiple comparisons
Fig.E9f	Veh	3
	α-CGRP	3
	sAβ-42	3		Veh vs. α-CGRP	0.7931	two-tailed Student’s t-tests
	sAβ-42+α-CGRP	3		sAβ-42 vs. sAβ-42+α-CGRP	0.0136	One-way ANOVA with post hoc Dunnett’s test
	sAβ-42+α-CGRP+Rim	3		sAβ-42 vs. sAβ-42+α-CGRP+Rim	0.1693	two-tailed Student’s t-tests
Fig.9g	Veh	3		Hdac11
	sAβ-42	3		Veh vs. sAβ-42	0.0002	One-way ANOVA with post hoc Dunnett’s test
	sAβ-42+α-CGRP	3		sAβ-42 vs. sAβ-42+α-CGRP	0.0685	One-way ANOVA with post hoc Dunnett’s test
	sAβ-42+Rim	3		sAβ-42 vs. sAβ-42+Rim	0.0002	One-way ANOVA with post hoc Dunnett’s test
	sAβ-42+α-CGRP+Rim	3		sAβ-42+α-CGRP vs. sAβ-42+α-CGRP+Rim	0.001	two-tailed Student’s t-tests
				Abca1
				Veh vs. sAβ-42	0.0015	One-way ANOVA with post hoc Dunnett’s test
				sAβ-42 vs. sAβ-42+α-CGRP	0.6814	One-way ANOVA with post hoc Dunnett’s test
				sAβ-42 vs. sAβ-42+Rim	0.0008	One-way ANOVA with post hoc Dunnett’s test
				sAβ-42+α-CGRP vs. sAβ-42+α-CGRP+Rim	0.0432	two-tailed Student’s t-tests
Fig.E9h	Veh	3(30primary neuron)
	sAβ-42	3(30primary neuron)		Veh vs. sAβ-42	<0.0001	One-way ANOVA with post hoc Dunnett’s test
	sAβ-42+α-CGRP	3(30primary neuron)		sAβ-42 vs. sAβ-42+α-CGRP	0.0077	One-way ANOVA with post hoc Dunnett’s test
	sAβ-42+Rim	3(30primary neuron)		sAβ-42 vs. sAβ-42+Rim	0.0004	One-way ANOVA with post hoc Dunnett’s test
	sAβ-42+α-CGRP+Rim	3(30primary neuron)		sAβ-42+α-CGRP vs. sAβ-42+α-CGRP+Rim	<0.0001	two-tailed Student’s t-tests
Fig.E9i	siNC	4		Hdac11
	SiHdac11	4		siNC vs. SiHdac11	0.0066	two-tailed Student’s t-tests
				Abca1
				siNC vs. SiHdac11	0.0069	two-tailed Student’s t-tests
Fig.E9j	siNC	3(30primary neuron)
	SiHdac11	3(30primary neuron)		siNC vs. SiHdac11	0.0059	two-tailed Student’s t-tests
Fig.E9k	WT+Veh	4
	5XFAD+Veh	4		5XFAD+Veh vs. WT+Veh	<0.0001	One-way ANOVA with post hoc Dunnett’s test
	5XFAD+Rim	4		5XFAD+Veh vs. 5XFAD+Rim	0.0208	One-way ANOVA with post hoc Dunnett’s test
	WT+Veh	4
	5XFAD+Veh	6		5XFAD+Veh vs. WT+Veh	<0.0001	One-way ANOVA with post hoc Dunnett’s test
	5XFAD+Rim	4		5XFAD+Veh vs. 5XFAD+Rim	0.0358	One-way ANOVA with post hoc Dunnett’s test
Fig.10Eb	Veh	4		Hdac11
	sAβ-42	4		Veh vs. sAβ-42	0.0055	One-way ANOVA with post hoc Dunnett’s test
	siHdac11	4		sAβ-42 vs. siHdac11	0.0337	One-way ANOVA with post hoc Dunnett’s test
				Nlrp3
				Veh vs. sAβ-42	0.0023	One-way ANOVA with post hoc Dunnett’s test
				sAβ-42 vs. siHdac11	0.0039	One-way ANOVA with post hoc Dunnett’s test
				Abca1
				Veh vs. sAβ-42	<0.0001	One-way ANOVA with post hoc Dunnett’s test
				sAβ-42 vs. siHdac11	0.0233	One-way ANOVA with post hoc Dunnett’s test
Fig.E10c	Veh	3
	sAβ-42	3		Veh vs. sAβ-42	0.0007	One-way ANOVA with post hoc Dunnett’s test
	siHdac11	3		sAβ-42 vs. siHdac11	0.0284	One-way ANOVA with post hoc Dunnett’s test
Fig.E10d	Veh	3		iNOS
	sAβ-42	3		Veh vs. sAβ-42	0.0021	One-way ANOVA with post hoc Dunnett’s test
	siHdac11	3		sAβ-42 vs. siHdac11	0.003	One-way ANOVA with post hoc Dunnett’s test
				Il6
				Veh vs. sAβ-42	0.0002	One-way ANOVA with post hoc Dunnett’s test
				sAβ-42 vs. siHdac11	0.0101	One-way ANOVA with post hoc Dunnett’s test
				Il1β
				Veh vs. sAβ-42	0.1317	One-way ANOVA with post hoc Dunnett’s test
				sAβ-42 vs. siHdac11	0.2415	One-way ANOVA with post hoc Dunnett’s test
				Tnfα
				Veh vs. sAβ-42	0.0678	One-way ANOVA with post hoc Dunnett’s test
				sAβ-42 vs. siHdac11	0.1863	One-way ANOVA with post hoc Dunnett’s test
Fig.E10e	Veh	3
	sAβ-42	3		Hdac11
	α-CGRP+sAβ-42	3		Veh vs. sAβ-42	0.0009	One-way ANOVA with post hoc Dunnett’s test
	α-CGRP	3		sAβ-42 vs. α-CGRP+sAβ-42	0.0098	One-way ANOVA with post hoc Dunnett’s test
	Rim+sAβ-42	3		sAβ-42 vs. Rim+sAβ-42	0.0044	One-way ANOVA with post hoc Dunnett’s test
	Rim+α-CGRP+sAβ-42	3		α-CGRP+sAβ-42 vs. Rim+α-CGRP+sAβ-42	0.0027	two-tailed Student’s t-tests
				Veh vs. α-CGRP	0.0007	two-tailed Student’s t-tests
				Nlrp3
				Veh vs. sAβ-42	0.0124	One-way ANOVA with post hoc Dunnett’s test
				sAβ-42 vs. α-CGRP+sAβ-42	<0.0001	One-way ANOVA with post hoc Dunnett’s test
				sAβ-42 vs. Rim+sAβ-42	0.0044	One-way ANOVA with post hoc Dunnett’s test
				α-CGRP+sAβ-42 vs. Rim+α-CGRP+sAβ-42	0.0023	two-tailed Student’s t-tests
				Veh vs. α-CGRP	0.74	two-tailed Student’s t-tests
				Abca1
				Veh vs. sAβ-42	<0.0001	One-way ANOVA with post hoc Dunnett’s test
				sAβ-42 vs. α-CGRP+sAβ-42	0.7903	One-way ANOVA with post hoc Dunnett’s test
				sAβ-42 vs. Rim+sAβ-42	0.0012	One-way ANOVA with post hoc Dunnett’s test
				α-CGRP+sAβ-42 vs. Rim+α-CGRP+sAβ-42	0.0049	two-tailed Student’s t-tests
				Veh vs. α-CGRP	0.0024	two-tailed Student’s t-tests
Fig.E10f	Veh	3
	sAβ-42	3		Veh vs. sAβ-42	0.001	One-way ANOVA with post hoc Dunnett’s test
	α-CGRP+sAβ-42	3		sAβ-42 vs. α-CGRP+sAβ-42	0.0049	One-way ANOVA with post hoc Dunnett’s test
	α-CGRP	3		sAβ-42 vs. Rim+sAβ-42	0.0446	One-way ANOVA with post hoc Dunnett’s test
	Rim+sAβ-42	3		α-CGRP+sAβ-42 vs. Rim+α-CGRP+sAβ-42	0.0057	two-tailed Student’s t-tests
	Rim+α-CGRP+sAβ-42	3		Veh vs. α-CGRP	0.0078	two-tailed Student’s t-tests
Fig.E10g	Veh	3		iNOS
	sAβ-42	3		Veh vs. sAβ-42	0.0132	One-way ANOVA with post hoc Dunnett’s test
	α-CGRP+sAβ-42	3		sAβ-42 vs. α-CGRP+sAβ-42	0.0618	One-way ANOVA with post hoc Dunnett’s test
	α-CGRP	3		sAβ-42 vs. Rim+sAβ-42	0.0133	One-way ANOVA with post hoc Dunnett’s test
	Rim+sAβ-42	3		α-CGRP+sAβ-42 vs. Rim+α-CGRP+sAβ-42	0.0519	two-tailed Student’s t-tests
	Rim+α-CGRP+sAβ-42	3		Veh vs. α-CGRP	0.9326	two-tailed Student’s t-tests
				Il6
				Veh vs. sAβ-42	0.041	One-way ANOVA with post hoc Dunnett’s test
				sAβ-42 vs. α-CGRP+sAβ-42	0.0268	One-way ANOVA with post hoc Dunnett’s test
				sAβ-42 vs. Rim+sAβ-42	0.2976	One-way ANOVA with post hoc Dunnett’s test
				α-CGRP+sAβ-42 vs. Rim+α-CGRP+sAβ-42	0.1384	two-tailed Student’s t-tests
				Veh vs. α-CGRP	0.0198	two-tailed Student’s t-tests
				Il1β
				Veh vs. sAβ-42	0.9679	One-way ANOVA with post hoc Dunnett’s test
				sAβ-42 vs. α-CGRP+sAβ-42	0.0962	One-way ANOVA with post hoc Dunnett’s test
				sAβ-42 vs. Rim+sAβ-42	0.9815	One-way ANOVA with post hoc Dunnett’s test
				α-CGRP+sAβ-42 vs. Rim+α-CGRP+sAβ-42	0.136	two-tailed Student’s t-tests
				Veh vs. α-CGRP	0.3268	two-tailed Student’s t-tests
				Tnfα
				Veh vs. sAβ-42	0.0217	One-way ANOVA with post hoc Dunnett’s test
				sAβ-42 vs. α-CGRP+sAβ-42	0.9867	One-way ANOVA with post hoc Dunnett’s test
				sAβ-42 vs. Rim+sAβ-42	0.0645	One-way ANOVA with post hoc Dunnett’s test
				α-CGRP+sAβ-42 vs. Rim+α-CGRP+sAβ-42	0.0488	two-tailed Student’s t-tests
				Veh vs. α-CGRP	0.1637	two-tailed Student’s t-tests
Fig.E10h	Veh+siNC	3
	sAβ-42+siNC	3		Hdac11
	Ele+sAβ-42+siNC	3		Veh+siNC vs. sAβ-42+siNC	0.017	One-way ANOVA with post hoc Dunnett’s test
	sAβ-42+siHdac11	3		sAβ-42+siNC vs. Ele+sAβ-42+siNC	>0.9999	One-way ANOVA with post hoc Dunnett’s test
				sAβ-42+siNC vs. sAβ-42+siHdac11	0.0308	One-way ANOVA with post hoc Dunnett’s test
				Nlrp3
				Veh+siNC vs. sAβ-42+siNC	0.0002	One-way ANOVA with post hoc Dunnett’s test
				sAβ-42+siNC vs. Ele+sAβ-42+siNC	0.0148	One-way ANOVA with post hoc Dunnett’s test
				sAβ-42+siNC vs. sAβ-42+siHdac11	0.0016	One-way ANOVA with post hoc Dunnett’s test
				Abca1
				Veh+siNC vs. sAβ-42+siNC	0.0356	One-way ANOVA with post hoc Dunnett’s test
				sAβ-42+siNC vs. Ele+sAβ-42+siNC	0.0285	One-way ANOVA with post hoc Dunnett’s test
				sAβ-42+siNC vs. sAβ-42+siHdac11	0.0054	One-way ANOVA with post hoc Dunnett’s test
Fig.E10i	Veh+siNC	3
	sAβ-42+siNC	3		Veh+siNC vs. sAβ-42+siNC	<0.0001	One-way ANOVA with post hoc Dunnett’s test
	Ele+sAβ-42+siNC	3		sAβ-42+siNC vs. Ele+sAβ-42+siNC	0.018	One-way ANOVA with post hoc Dunnett’s test
	sAβ-42+siHdac11	3		sAβ-42+siNC vs. sAβ-42+siHdac11	0.0048	One-way ANOVA with post hoc Dunnett’s test
Fig.E10j	Veh+siNC	3
	sAβ-42+siNC	3		iNOS
	Ele+sAβ-42+siNC	3		Veh+siNC vs. sAβ-42+siNC	0.0061	One-way ANOVA with post hoc Dunnett’s test
	sAβ-42+siHdac11	3		sAβ-42+siNC vs. Ele+sAβ-42+siNC	0.0667	One-way ANOVA with post hoc Dunnett’s test
				sAβ-42+siNC vs. sAβ-42+siHdac11	0.0135	One-way ANOVA with post hoc Dunnett’s test
				Il6
				Veh+siNC vs. sAβ-42+siNC	0.0011	One-way ANOVA with post hoc Dunnett’s test
				sAβ-42+siNC vs. Ele+sAβ-42+siNC	0.0048	One-way ANOVA with post hoc Dunnett’s test
				sAβ-42+siNC vs. sAβ-42+siHdac11	0.0025	One-way ANOVA with post hoc Dunnett’s test
				Il1β
				Veh+siNC vs. sAβ-42+siNC	0.085	One-way ANOVA with post hoc Dunnett’s test
				sAβ-42+siNC vs. Ele+sAβ-42+siNC	0.2615	One-way ANOVA with post hoc Dunnett’s test
				sAβ-42+siNC vs. sAβ-42+siHdac11	0.1823	One-way ANOVA with post hoc Dunnett’s test
				Tnfα
				Veh+siNC vs. sAβ-42+siNC	0.0431	One-way ANOVA with post hoc Dunnett’s test
				sAβ-42+siNC vs. Ele+sAβ-42+siNC	0.0943	One-way ANOVA with post hoc Dunnett’s test
				sAβ-42+siNC vs. sAβ-42+siHdac11	0.0607	One-way ANOVA with post hoc Dunnett’s test
