# Supplementary material
Source: Research Square preprint supplement (doi:10.21203/rs.3.rs-9358637/v1)
Supplement: Supplementary file 3 [file 8c7c037881211cceebe6c834.xlsx]

## Sheet: Supplementary Table 2
Supplementary Table 3	Oligonucleotides sequences
RT-qPCR
	Forward	Reverse
Il-1β	CTCCATGAGCTTTGTACAAGG;	TGCTGATGTACCAGTTGGGG
NOS2	CCCTTCCGAAGTTTCTGGCAGCAG	GGCTGTCAGAGCCTCGTGGCTTTGG
Tnf-α	GACCCTCACACTCAGATCATCTTCT	CCTCCACTTGGTGGTTTGCT
Il-6	CATAGCTACCTGGAGTACATGA	CATTCATATTGTCAGTTCTTCG
Il-4	TGCCTGGATTCATCGATAAGCTG	TTGCATGATGCTCTTTAGGCTT
Tgf-β	TGCGCTTGCAGAGATTAAAA	CGTCAAAAGACAGCCACTCA
Hdac11	TTACAACCGCCACATCTACC	GACATTCCTCTCCACCTTCTC
Nlrp3	TGGGCAACAATGATCTTGGC	GTACATTTCACCCAACTGTAGGC
β-actin	CAGGATGCAGAAGGAGATTAC	AACGCAGCTCAGTAACAGTC
