# Supplementary material
Source: Research Square preprint supplement (doi:10.21203/rs.3.rs-9358637/v1)
Supplement: Supplementary file 4 [file c8402e17fd7f59a6e07d6333.xlsx]

## Sheet: Sheet1
Supplementary Table 2	List of antibodies
Antibodies	SOURCE	CATALOGUE NUMBER
Rabbit polyclonal anti-CALCRL 1:1000	Affinity Biosciences	DF10203
Rabbit polyclonal anti- APP 1:1000	Affinity Biosciences	AF6084;
Rabbit polyclonal anti- Tau 1:1000	Affinity Biosciences	AF6141
Rabbit polyclonal anti- phospho-Tau (Ser396) 1:500	Affinity Biosciences	F3148;
Rabbit polyclonal anti- Synapsin I 1:1000	Affinity Biosciences	AF6201;
Rabbit polyclonal anti- PSD95 1:1000	Affinity Biosciences	AF5283;
Rabbit monoclonal anti-NLRP3(D4D8T) 1:500	Cell Signaling Technology(CST)	15101
Purified anti-β-Amyloid, 1-16 Antibody, mouse IgG 1:500	Biolegend	803001
Rabbit polyclonal anti- GFAP 1:1000	Proteintech	16825-1-AP;
Rat polyclonal anti- GFAP 1:1000	Invitrogen	Biotin-16825
Rat polyclonal anti- CD68 1:500	BioRad	MCA1957T
Rat monoclonal anti-C3 1:500	Abcam	ab11862
Rabbit monoclonal anti- IBA1 1:1000	Abcam	ab178846;
Mouse monoclonal anti-NeuN 1:500	Sigma-Aldrich	MAB377X
Rabbit monoclonal anti-MAP2 1:2000	Millipore	MAB341
Rabbit monoclonal anti- HDAC11 1:1000	Abcam	ab315883
Rabbit polyclonal anti- CALCA 1:500	Affinity Biosciences	DF7386;
Mouse monoclonal anti-ABCA1 1:1000	Abcam	ab18180
Rabbit polyclonal anti- acetyl-Lysine 1:1000	Sigma-Aldrich	06-933;
Mouse monoclonal anti-β-actin 1:2000	Affinity Biosciences	T0022;
Rabbit monoclonal anti- LXR beta/NER 1:500	Abcam	ab315082
Alexa Fluor 488 conjugated goat secondary immunoglobulin G (H+L) antibodies to mouse (1:1000)	Thermo Fisher	A32731;
Alexa Fluor 488 conjugated goat secondary immunoglobulin G (H+L) antibodies to rabbit (1:1000)	Thermo Fisher	A32723;
Alexa Fluor 594 conjugated goat secondary immunoglobulin G (H+L) antibodies to mouse (1:1000)	Thermo Fisher	A11037;
Alexa Fluor 594 conjugated goat secondary immunoglobulin G (H+L) antibodies to rabbit (1:1000)	Thermo Fisher	A21203;
Alexa Fluor 647 conjugated goat secondary immunoglobulin G (H+L) antibodies to mouse (1:1000)	Thermo Fisher	A32728;
Alexa Fluor 647 conjugated goat secondary immunoglobulin G (H+L) antibodies to rabbit (1:1000)	Thermo Fisher	A31573;
CyTM3-conjugated AffiniPure® Donkey Anti-Rat IgG (H+L)	Jackson Immuno Research LABORATORIES	712-165-153
IRDye® 800CW Goat anti-Rabbit (1:2000)	Lincoln	926-32211;
RDye® 680RD Goat anti-Mouse (1:2000)	Lincoln	926-68070;
VeriBlot for IP Detection Reagent (HRP) (1:500)	Abcam	ab131366;
